# Supplementary material for: Perovskite-organic hybrid tandem solar cells using a nanostructured perovskite layer as the light window and a PFN/doped-MoO3/MoO3 multilayer as the interconnecting layer
Source: Royal Society of Chemistry journal article supplement (doi:10.1039/c5nr07457f), 2016-01-01
Supplement: c5nr07457f1.pdf [file c5nr07457f1.pdf]

## Electronic Supplementary Information

**Perovskite-organic hybrid tandem solar cells using nanostructured perovskite layer as light window and PFN/doped-MoO<sub>3</sub>/MoO<sub>3</sub> multi-layer interconnection layer**

Jian Liu<sup>#</sup>, Shunmian Lu<sup>#</sup>, Lu Zhu, Xinchun Li, and Wallace C. H. Choy<sup>\*</sup>

*Department of Electrical and Electronic Engineering, The University of Hong Kong, Pokfulam Road, Hong Kong, China.*

\*E-mail: [chchoy@eee.hku.hk](mailto:chchoy@eee.hku.hk)

<sup>#</sup> These authors contributed equally to this work.

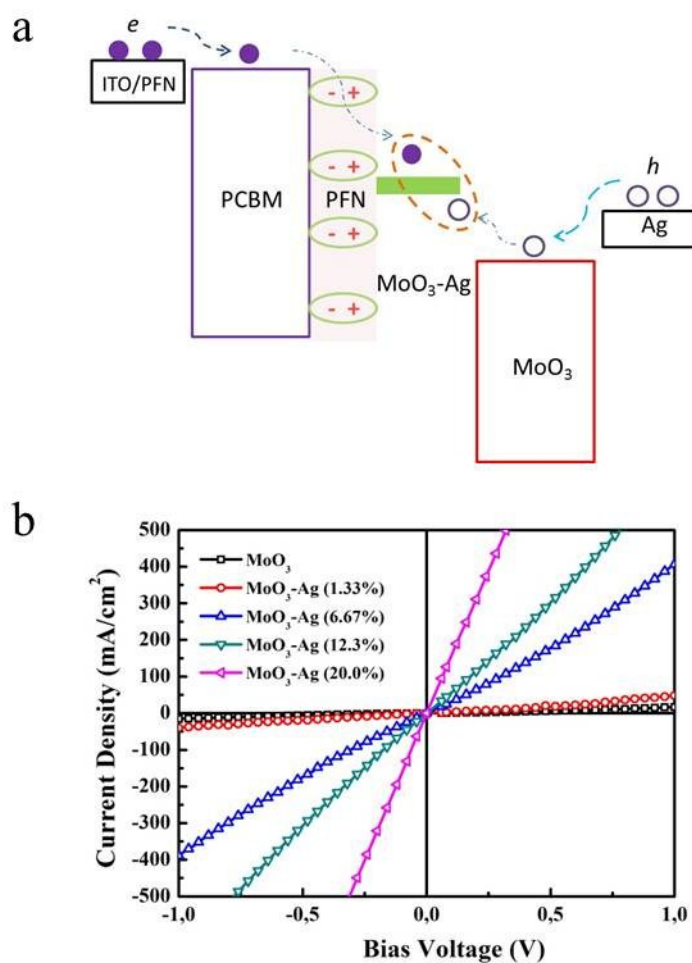

**Figure S1.** The schematic of working principle of the ICL diode with device architecture: ITO/PFN/PCBM/PFN/MoO<sub>3</sub>-Ag (x%)/MoO<sub>3</sub>/Ag (a) and the J-V characteristics of corresponding devices with Ag content from 0% to 20%.

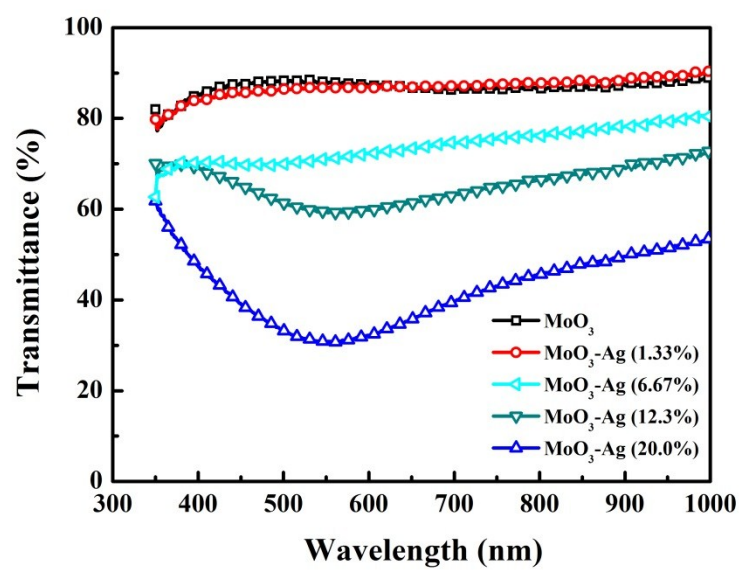

**Figure S2.** The transmittance spectra of ICLs on quartz substrate based on  $\text{MoO}_3\text{-Ag}$  step layer with Ag weight percentage from 0% to 20%.
